# Supplementary material
Source: PubMed Central journal article supplement (PMC2877528)
Supplement: msp325_1.pdf [file msp325_1.pdf]

A)

|                     |                                                                 |
|---------------------|-----------------------------------------------------------------|
| Chicken alphaE      | ALTOAEKAAVTTIWAQVATQIESIGLESLELRFASYPQTKTYFPHFDDVDSQGSVQLRGHGS  |
| Zebra finch alphaE  | TLTQAEKAAVVTIWAQVATQADAIGAESLELRFSLYPQTKTYFPHFDDLSQGSQAQLRGHGS  |
| Anole lizard alphaD | VLTAEDRKLTLTAIWGKVSGLHDEIGGDALNRMFMCFPSTKTYFPHFDDLSPGSKDIQVHGQ  |
| Chicken alphaD      | MLTAEDKKLIQQAWEKAASHQEFEAGAEALTRMFTTYPQTKTYFPHFDDLSPGSDQVVRGHGK |
| Zebra finch alphaD  | MLTGEDKKLLQQTWGWKLGGAEEVGDALWRMFMHSYPPTKTYFPHFDDMSQGSQDQVVRGHGK |
| Anole lizard alphaA | MLTEDDKNHIRAIWGHVSSNPELYGAEALTRLFAAHHTTKTYFPHYDMSPGSAQIKAHGK    |
| Zebra finch alphaA  | VLSAGDKSNVKAQVFGKIGGQADEYGADALERMFATYPQTKTYFPHFDDLGKGSQAQVKGHGS |

\*: .: : : : . : \* ::\* :\* . \*\*\*\*\*:\*. \*\* :. \*\*.

|                     |                                                              |
|---------------------|--------------------------------------------------------------|
| Chicken alphaE      | KVLNAIGEAVKNIDDIRGALAKLSELHAYILRVDPVNFKLLSHCILCSVAARYPSDFTPE |
| Zebra finch alphaE  | KVMSAIGEAVKDIDDIRRALAKLSELHAYILRVDPVNFKLLSHCILCSVAAHYPLDFTPE |
| Anole lizard alphaD | KVARALDMALHHLDNVRGTLADLSLHAYNLRVDPVNFKLLIKCFHVVLATHLRGEYTCL  |
| Chicken alphaD      | KVLGALGNAVKNVDNLSQAMAELSNLHAYNLRVDPVNFKLLSQCIQVVLAVHMGKDYTPE |
| Zebra finch alphaD  | KVMAALSNAVKNLDNLSQALSELNLHAYNLRVDPVNFKLLSQCLQVTLATRLGKEYSPE  |
| Anole lizard alphaA | KVVEAITQAVNNLDDIAGALAKLADLHAEKLRVDPVNFLLGHCLLVTTIAAHNRGPLKPE |
| Zebra finch alphaA  | KVAAALVEAANNVDDLALGALSLSLHAQKLRVDPVNFKLLGQCFLVVVATRNPSLLTPE  |

\*\* \*: \* : :\*: : :\*:\*\* \*\*\*\*\* :\* :\* :\*.. .

|                     |                       |
|---------------------|-----------------------|
| Chicken alphaE      | VHAAWDKFLSSISSVLTEKYR |
| Zebra finch alphaE  | VHAAWDKFLSSVSSVLTEKYR |
| Anole lizard alphaD | AHRAVDKFLFAVAEILGEKYR |
| Chicken alphaD      | VHAAFDKFLSAVAVLAEKYR  |
| Zebra finch alphaD  | VHSAVDKFMASAVAVLAEKYR |
| Anole lizard alphaA | FILALDKCFTSIGRVLIAQYR |
| Zebra finch alphaA  | VHASLDKFLCAVGTVLTAKYR |

: \*\* : :. :\* :\*\*

B)

|                 |                                                            |
|-----------------|------------------------------------------------------------|
| Chicken rho     | VHWSAEKQLITSVWSKVNVEECGAEALARLLIYYPWTQRFDFNFGNLSPTAIIGNPK  |
| Chicken epsilon | VHWSAEKQLITSVWSKVNVEECGAEALARLLIYYPWTQRFDFASFGNLSPTAIMGNPR |
| Zebra finch rho | VHWSAEKQLIASVWGRVSVVEECGAEALARLLIYYPWTQRFDFSGNLSPTAIVGNPK  |
| Chicken BH      | VHWTAEKQLITGLWGKVNVAECGAEALARLLIYYPWTQRFDFASFGNLSPTAIVGNPM |
| Zebra finch BH  | VNWTAEKQLVTTLWGRVNVDECGAEALARLLVYYPWTQRFDFVSGNMSPTAVLGNPM  |
| Chicken BA      | VHWTAEKQLITGLWGKVNVAECGAEALARLLIYYPWTQRFDFASFGNLSPTAILGNPM |
| Zebra finch BA  | XXWTAEKQLITGLLGKVNVEPCGAEALARLLIYYPWTQRFDFASFGNLSPTAVLGNPK |
| Anole lizard B1 | VHWTAEKQLITGLWGKVDVATVGAESLGGMVCYPWTQRFDFDFGNLSPTAICANPK   |
| Anole lizard B2 | VHWTAEKQLIANCWSKVDIGQIGGDALACLLCVYPWTQRFDFDFGNLSNAATCANAK  |

\*:\*\*\*\*\*: .\*. : \*.:\* . : : \*\*\*\*\* .\*\*\*:\*. :\* :\* .

|                 |                                                             |
|-----------------|-------------------------------------------------------------|
| Chicken rho     | VRAHGKVLSSFGAEVKNLDNIKNTYAKLSELHCEKLVDPENFRLLGNILIVLAAHFT   |
| Chicken epsilon | VRAHGKVLSSFGAEVKNLDNIKNTYAKLSELHCDKLVDPENFRLLGDILIVLASHFA   |
| Zebra finch rho | VRAHGKVLTSFGEAIKNDNLKGTYSKSELHCDKLVDPENFRLLGDILIVLAAHFT     |
| Chicken BH      | VRAHGKVLSSFGAEVKNLDNIKKSFAQLSKLHCDKLVDPENFRLLGDILIVLASHFS   |
| Zebra finch BH  | VRAHGKVLTSFGEAVRNMDSVKCFQAQLSKLHCEKLVDPENFRLLGDVLLVVLASHFG  |
| Chicken BA      | VRAHGKVLTSFGDVAVKNLDNIKNTFSQLSELHCDKLVDPENFRLLGDILIVLAAHFS  |
| Zebra finch BA  | VQAHGKVLTSFGEAVKNLDSIKNTFSQLSELHCDKLVDPENFRLLGDILIVVLAHFG   |
| Anole lizard B1 | VRAHGKVLTAFGDAIKSLDNIKDTFAKLSELHCDKLVDPENFKLLGKILLVLAGHHG   |
| Anole lizard B2 | VKAHGKVLTAFGAEVKNLDNIKDTFAKLSELHCDKLVDPVNFNLLGDVLIIVCLAAHFG |

\*.\*\*\*\*\*:\*. :\*.:\* . : : \*\*\*\*\* .\*\*\*:\*. :\* :\* .

|                 |                             |
|-----------------|-----------------------------|
| Chicken rho     | KDFTPTCQAVWQKLVSVVAHALAYKYH |
| Chicken epsilon | RDFTPACQFAWQKLVNVVAHALARKYH |
| Zebra finch rho | KEFTPACQATWQKLVGVVAHALARKYH |
| Chicken BH      | KDFTPASQAAWQKLVVVAHALAHEYH  |
| Zebra finch BH  | KEFTPACQAAWQKLVVVAHALAHEYH  |
| Chicken BA      | KDFTPCQAAWQKLVVVAHALARKYH   |
| Zebra finch BA  | KDFTPDCQAAWQKLVVVAHALARKYH  |
| Anole lizard B1 | KDFTPACHAAYQKLVNVVSHALARRYH |
| Anole lizard B2 | KDFTPACHAAYQKLVNSVAHGLSRRYH |

.:\*\*\* .: .:\*. :\* :\*.:\* :\*\*

Supplementary Figure 1. Amino acid sequence alignments of  $\alpha$ - and  $\beta$ -globin genes of the chicken (*Gallus gallus*), zebra finch (*Taeniopygia guttata*) and the Anole lizard (*Anolis carolinensis*). A)  $\alpha$ -globin genes alignment, B)  $\beta$ -globin genes sequence alignment.
